# Supplementary material for: Synthesis of two tetra-azolium salts and the recognition performance for guests
Source: Royal Society of Chemistry journal article supplement (doi:10.1039/d2nj04255j), 2022-01-01
Supplement: d2nj04255j1.pdf [file d2nj04255j1.pdf]

## Supporting Information

### Synthesis of two tetra-azolium salts and the recognition performance for guests

Zhi-Xiang Zhao,<sup>a</sup> Lin-Hai Hu,<sup>a</sup> Shao-Cong Yu<sup>a</sup> and Qing-Xiang Liu<sup>\*a</sup>

<sup>a</sup>Tianjin Key Laboratory of Structure and Performance for Functional Molecules,  
College of Chemistry, Tianjin Normal University, Tianjin 300387, P. R. China.

\* Corresponding author, E-mail: tjnulqx@163.com

#### List of the contents

1. CCDC numbers for compound **1**.
2. Summary of crystallographic data for **1** (Table S1)
3. The crystal packing of **1** (Fig. S1).
4. H-Bonding Geometry (Å, °) for **1** (Table S2).
5. Fluorescence experiments, UV/Vis experiments and Job's plot.
6. The UV/Vis spectra, fluorescence spectra, HRMS, IR spectra of **1**, OPD and **1**•OPD (Fig. S2-Fig. S11 and Scheme S1).
7. The UV/Vis spectra, fluorescence spectra, HRMS, IR spectra of **2**, F<sup>-</sup> and **2**•F<sup>-</sup> (Fig. S12-Fig. S21).
8. The <sup>1</sup>H NMR and <sup>13</sup>C NMR spectra of intermediate and compounds **1** and **2** (Fig. S22-Fig. S29).

## 1. CCDC number for compound 1.

CCDC 2161181 for **1** contains the supplementary crystallographic data. The data can be obtained free of charge via <http://www.ccdc.cam.ac.uk/conts/retrieving.html>, or from the Cambridge Crystallographic Data Centre, 12 Union Road, Cambridge, CB2 1EZ, UK; fax: (+44) 223-336-033; or e-mail: deposit@ccdc.cam.ac.uk.

## 2. Summary of crystallographic data for 1.

**Table S1** Summary of crystallographic data for **1**

|                                               |                                                                                |                                                                              |                    |
|-----------------------------------------------|--------------------------------------------------------------------------------|------------------------------------------------------------------------------|--------------------|
| Chemical formula                              | C <sub>62</sub> H <sub>54</sub> F <sub>24</sub> N <sub>12</sub> P <sub>4</sub> | <i>F</i> (000)                                                               | 786.0              |
| Fw                                            | 1547.05                                                                        | Cryst size, mm                                                               | 0.25 × 0.24 × 0.23 |
| Cryst syst                                    | triclinic                                                                      | $\theta_{\min}, \theta_{\max}$ , deg                                         | 3.74, 50.012       |
| Space group                                   | P-1                                                                            | <i>T</i> /K                                                                  | 149.7(9)           |
| <i>a</i> /Å                                   | 11.7095(6)                                                                     | No. of data collected                                                        | 11506              |
| <i>b</i> /Å                                   | 12.1400(6)                                                                     | No. of unique data                                                           | 5748               |
| <i>c</i> /Å                                   | 12.8528(8)                                                                     | No. of refined params                                                        | 460                |
| $\alpha$ /°                                   | 74.284(5)                                                                      | Goodness-of-fit on <i>F</i> <sup>2a</sup>                                    | 1.028              |
| $\beta$ /°                                    | 69.199(5)                                                                      | Final <i>R</i> indices <sup>b</sup> [ <i>I</i> ><br>2 $\sigma$ ( <i>I</i> )] |                    |
| $\gamma$ /°                                   | 79.296(4)                                                                      | <i>R</i> 1                                                                   | 0.0587             |
| <i>V</i> /Å <sup>3</sup>                      | 1635.97(17)                                                                    | <i>wR</i> 2                                                                  | 0.1489             |
| <i>Z</i>                                      | 1                                                                              | <i>R</i> indices (all data)                                                  |                    |
| <i>D</i> <sub>calcd</sub> , Mg/m <sup>3</sup> | 1.570                                                                          | <i>R</i> 1                                                                   | 0.0791             |
| Abs coeff, mm <sup>-1</sup>                   | 0.236                                                                          | <i>wR</i> 2                                                                  | 0.1654             |

<sup>a</sup>*GOF* =  $[\sum \omega(F_o^2 - F_c^2)^2 / (n-p)]^{1/2}$ , where *n* is the number of reflection and *p* is the number of parameters refined. <sup>b</sup>*R*<sub>1</sub> =  $\Sigma(|F_o| - |F_c|) / \Sigma|F_o|$ ; *wR*<sub>2</sub> =  $[\Sigma[w(F_o^2 - F_c^2)^2] / \Sigma w(F_o^2)^2]^{1/2}$ .

## 3. The crystal packing of 1.

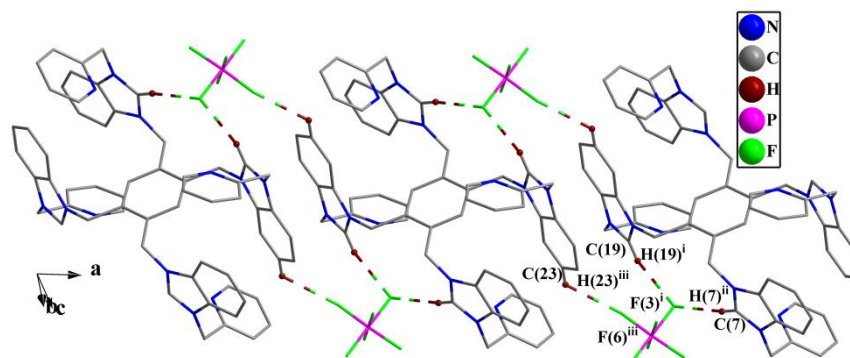

**Fig. S1** 1D polymeric chain of compound **1**.

#### 4. H-Bonding Geometry (Å, °) for **1**.

**Table S2.** H-Bonding Geometry (Å, °) for **1**

|          | D-H...A                           | D-H      | H...A    | D...A    | D-H...A  |
|----------|-----------------------------------|----------|----------|----------|----------|
| <b>1</b> | C(1)9-H(19)...F(3) <sup>i</sup>   | 0.930(1) | 2.547(4) | 3.339(1) | 143.2(7) |
|          | C(7)-H(7)...F(3) <sup>ii</sup>    | 0.930(1) | 2.430(2) | 3.328(2) | 162.3(8) |
|          | C(23)-H(23)...F(6) <sup>iii</sup> | 0.930(1) | 2.588(6) | 3.179(5) | 121.8(6) |

Symmetry code: i: 2-x, 1 -y, - z; ii: 2-x, 1 -y, 1-z; iii: 2-x, 1-y, 1-z for **1**

#### 5. Fluorescence experiments, UV/Vis experiments and Job's plot

##### 5.1 Fluorescent experiments

The stock solutions of hosts and guests ( $5.0 \times 10^{-4}$  mol/L for host and  $5.0 \times 10^{-3}$  mol/L for guest) were prepared via dissolving the host or the guest in CH<sub>3</sub>CN at 25 °C. Test solutions were prepared via putting the host stock solution (0.1 mL) or the appropriate amount of the guest stock solution in a 10 mL volumetric flask, which were diluted to 10 mL. In the test solutions, the concentrations of the guest were from 0 to  $30 \times 10^{-6}$  mol/L for **1** and 0 to  $15 \times 10^{-6}$  mol/L for **2**. The samples were excited at 260 nm for **1** and 318 nm for **2**.

The stock solution of NO was prepared by dissolving diethylamineNONOate (DEA·NONOate) ( $5.0 \times 10^{-3}$  mol/L, a NO-releasing reagent) in NaOH solution (0.01 mol/L), and test solutions were prepared via putting the host stock solution (0.1 mL) or the appropriate amount of the guest stock solution in a 10 mL volumetric flask with phosphate-buffered saline (PBS) solution (pH 7.4). In the test solutions, the concentrations of DEA·NONOate were from 0 to  $30 \times 10^{-6}$  mol/L. After an incubation of 10 min, the fluorescent intensity was recorded.

##### 5.2 UV experiments

In UV experiments, the stock solutions and test solutions were prepared in the ways that are similar to the fluorescent experiments. The concentration of host was  $1.0 \times 10^{-5}$  mol/L, and the concentrations of the guest were from 0 to  $22.5 \times 10^{-6}$  mol/L for **1** and 0 to  $6 \times 10^{-6}$  mol/L for **2**.

##### 5.3 Method of Job's plot

In Job's plot experiments, the stock solutions and test solutions were prepared in the ways that are similar to the fluorescent experiments. In the experiments, the fixed total concentration ( $1.0 \times 10^{-5}$  mol/L) was kept, and the molar fractions of guests were in the range of 0-1.

## 6. The UV/Vis spectra, fluorescence spectra, HRMS, IR spectra of **1**, OPD and **1**·OPD

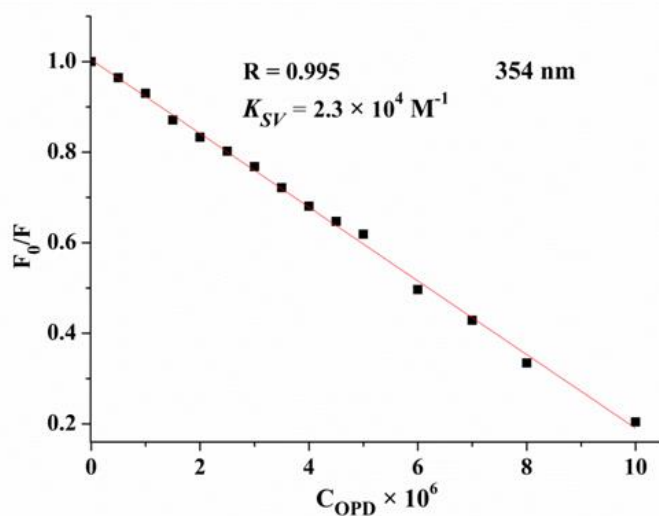

**Fig. S2** Stern-Volmer plot describing **1** increasing caused by OPD association in  $\text{CH}_3\text{CN}$  at 354 nm. The  $K_{SV}$  is  $2.3 \times 10^4 \text{ M}^{-1}$ , and the linear range is from  $0$ - $10.0 \times 10^{-6}$  mol/L.

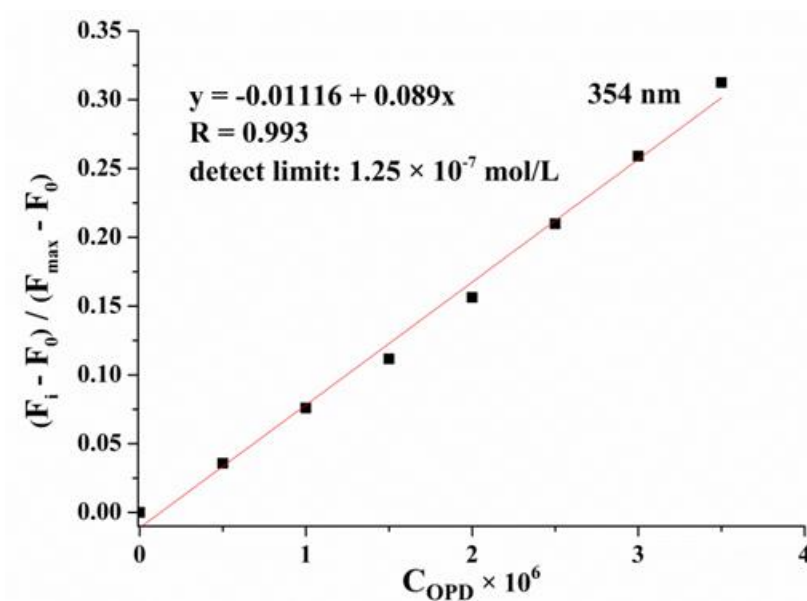

**Fig. S3** Emission of **1** at different concentrations of OPD ( $0$ ,  $0.5$ ,  $1$ ,  $1.5$ ,  $2.0$ ,  $2.5$ ,  $3.0$ ,  $3.5 \times 10^{-6}$  mol/L) added at 354 nm. The detection limit was determined to be  $1.25 \times 10^{-7}$  M.

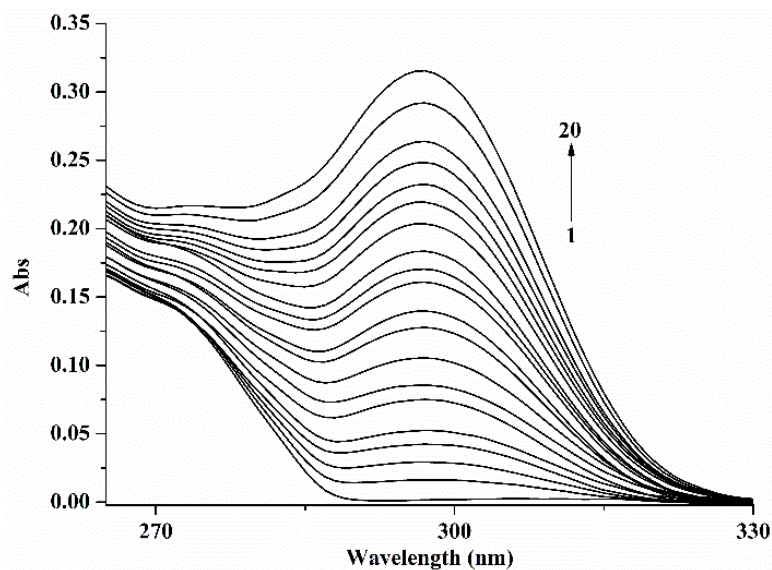

**Fig. S4** UV/vis titration spectra of **1** ( $1 \times 10^{-5}$  mol/L).  $C_{OPD}$  are 0, 0.5, 1, 1.5, 2.0, 2.5, 3.0, 3.5, 4.0, 4.5, 5.0, 6.0, 7.0, 8.0, 10, 12.5, 15, 17.5, 20,  $22.5 \times 10^{-5}$  mol/L.

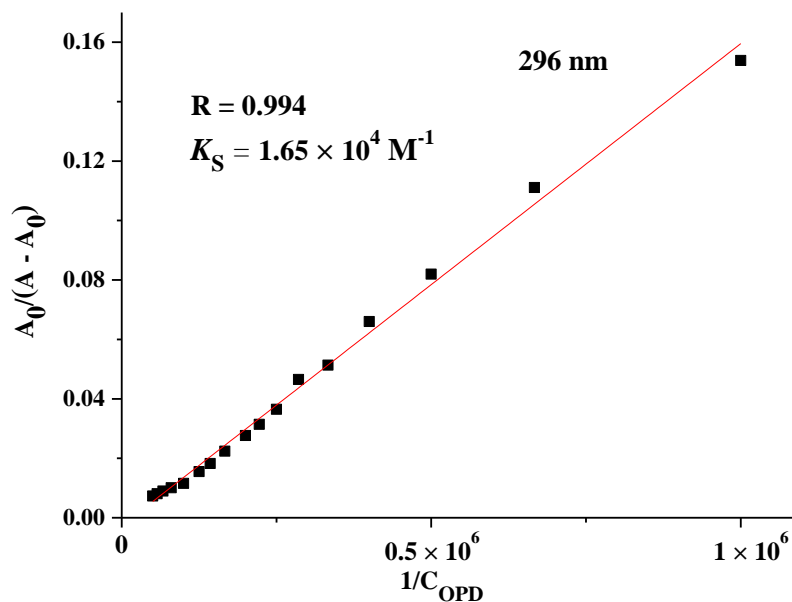

**Fig. S5** Linear relationship between  $A_0/(A - A_0)$  versus  $1/C_{OPD}$  based on the standard equation: Benesi-Hildebrand plots at 296 nm.

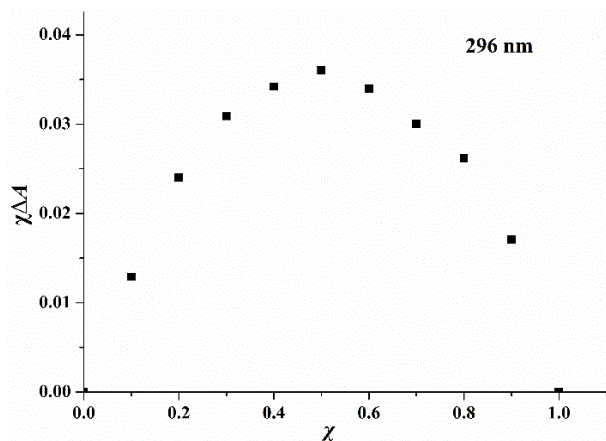

**Fig. S6** Job's plot of **1** to OPD in CH<sub>3</sub>CN at 296 nm.

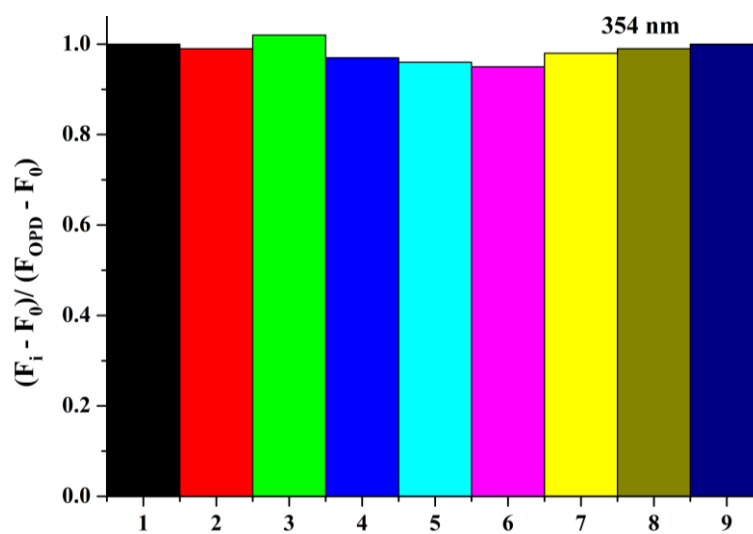

**Fig. S7** Change ratio  $(F_0 - F_i)/(F_0 - F_{OPD})$  of fluorescence intensity at 354 nm of **1** upon addition of 5 equiv. of OPD in the presence of 5 equiv. of background molecules. (1) OPD; (2) OPD + *m*-phenylenediamine; (3) OPD + *p*-phenylenediamine; (4) OPD + *m*-dinitrobenzene; (5) OPD + *p*-nitrotoluene; (6) OPD + nitrobenzene; (7) OPD + *o*-nitroaniline; (8) OPD + *m*-nitroaniline; (9) OPD + *p*-nitroaniline in CH<sub>3</sub>CN at 25 °C.

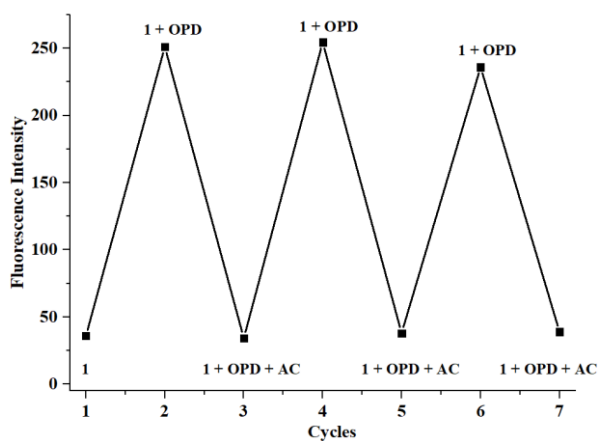

**Fig. S8** Reversible behavior of **1** upon the addition of OPD and acetyl chloride (AC).

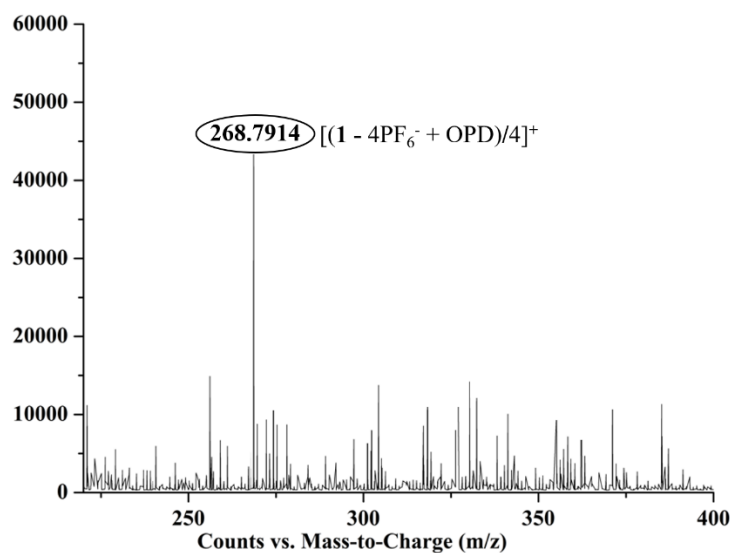

**Fig. S9** HRMS spectra for **1**·OPD. MS (EI):  $[(1 + OPD - 4PF_6^-)/4]^+ = 268.7914$ .

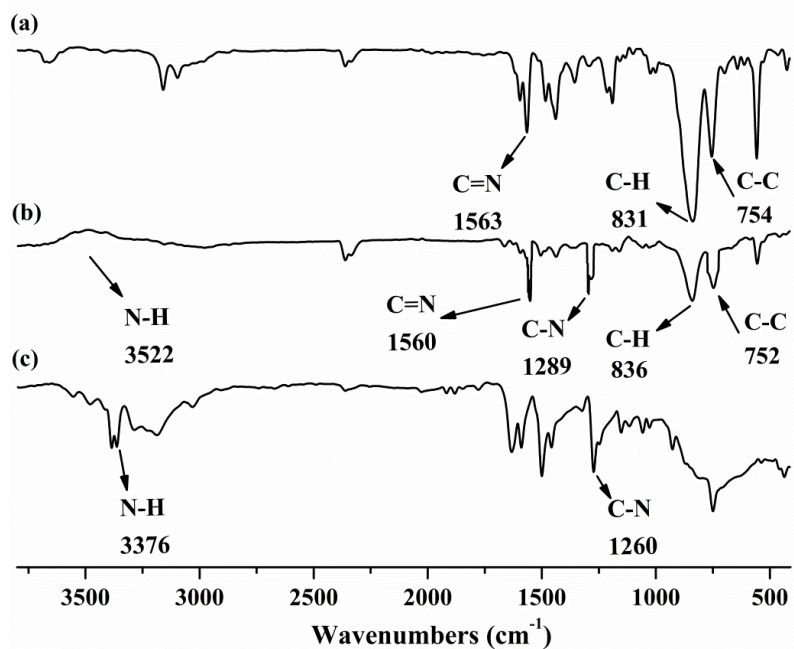

**Fig. S10** Infrared spectra of (a) OPD, (b) **1** and (c) **1**·OPD.

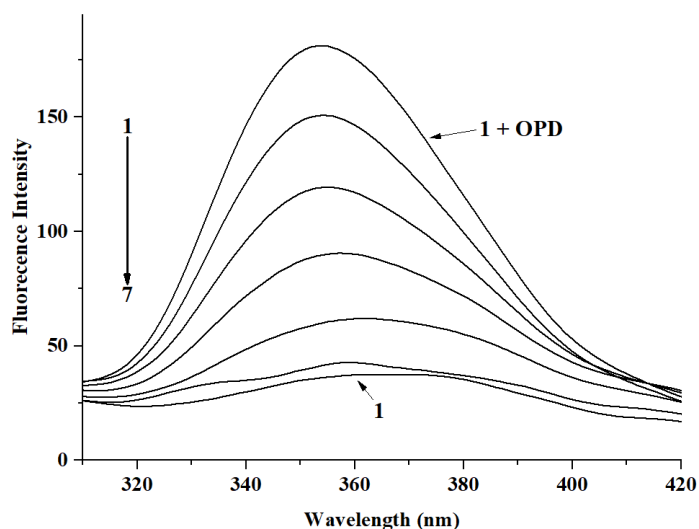

**Fig. S11** Fluorescence spectra of **1**·OPD ( $5 \times 10^{-6}$  mol/L) upon the addition of DEA·NONOate ( $0, 5, 10, 15, 20, 25, 30 \times 10^{-6}$  mol/L) in PBS (phosphate-buffered saline solution (pH 7.4)) buffer solution ( $\lambda_{\text{ex}} = 260$  nm, slit: ex = 5 nm, em = 5 nm).

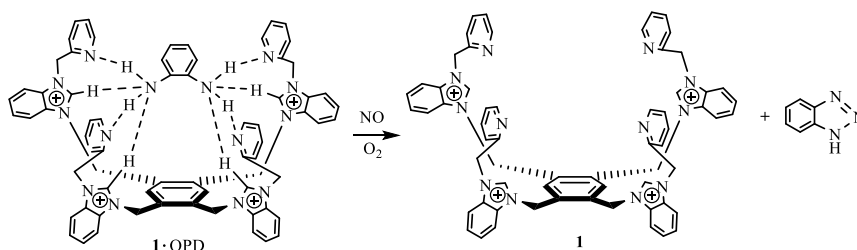

**Scheme S1** The reaction between OPD of **1**·OPD and NO.

## 7. The UV/Vis spectra, fluorescence spectra, HRMS, IR spectra of **2**, $\text{F}^-$ and $2\cdot\text{F}^-$

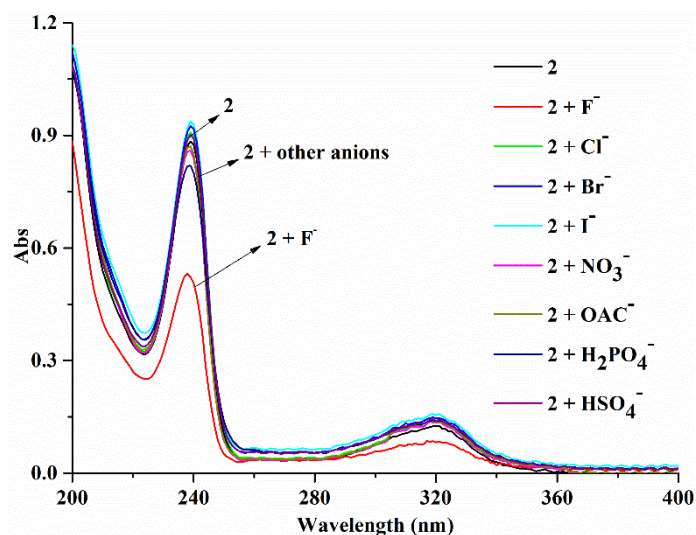

**Fig. S12** UV-vis absorption spectra of **2** ( $1 \times 10^{-5}$  mol/L) and upon the addition of 2 equiv. of anions  $\text{F}^-$ ,  $\text{Cl}^-$ ,  $\text{Br}^-$ ,  $\text{I}^-$ ,  $\text{H}_2\text{PO}_4^-$ ,  $\text{HSO}_4^-$ ,  $\text{OAc}^-$  and  $\text{NO}_3^-$ , and their cations being tetrabutylammonium ( $\text{TBA}^+$ ) in  $\text{CH}_3\text{CN}$  at  $25^\circ\text{C}$ .



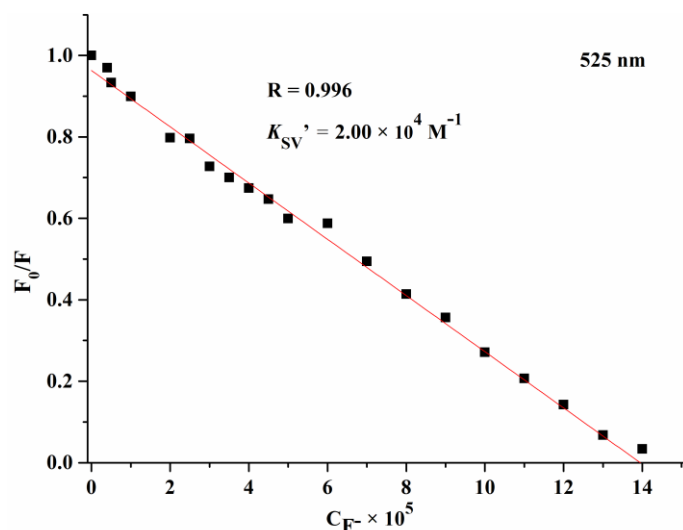

**Fig. S13** Stern-Volmer plot describing **2** increasing caused by  $F^-$  association in  $CH_3CN$  at 525 nm. The  $K_{SV}'$  is  $2.00 \times 10^4 \text{ M}^{-1}$ , and the linear range is from 0-13.0  $\times 10^{-5}$  mol/L.

$$F_0/F = 1 + K_{SV}'C_{F^-} \quad (1)$$

where  $F_0$  and  $F$  were the fluorescence intensities of **2** in absence and presence of  $F^-$ , respectively.  $C_{F^-}$  represented the concentration of  $F^-$  and  $K_{SV}'$  was the association constant.

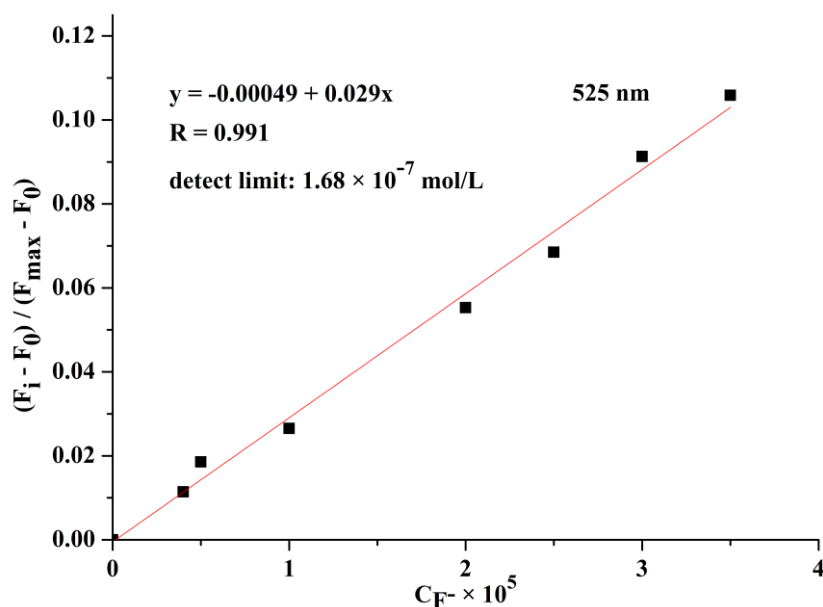

**Fig. S14** Emission of **2** at different concentrations of  $F^-$  (0, 0.4, 0.5, 1, 2, 2.5, 3,  $3.5 \times 10^{-5}$  mol/L) at 525 nm, normalized between the minimum emission (0.0 mol/L of TBAF) and the emission at  $3.5 \times 10^{-5}$  mol/L of TBAF. The detection limit was determined to be  $1.68 \times 10^{-7} \text{ M}$ .

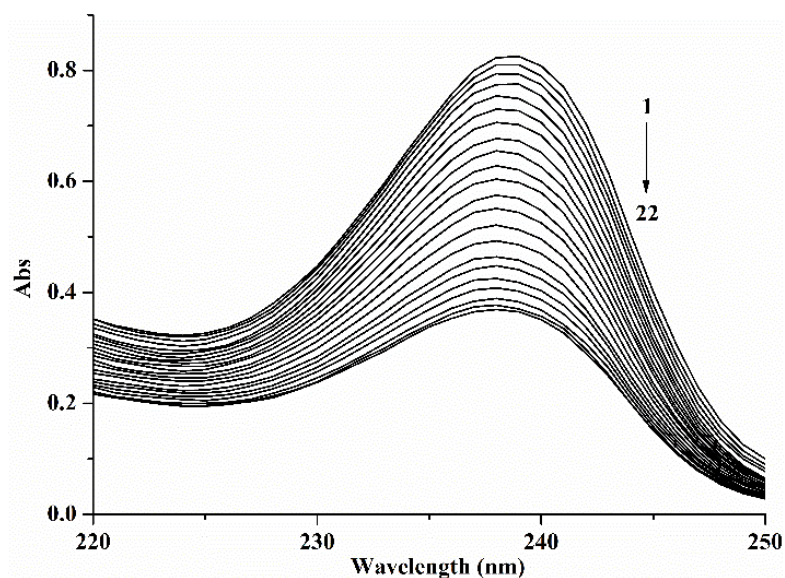

**Fig. S15** UV/vis titration spectra of **2** ( $1.0 \times 10^{-5} \text{ mol}\cdot\text{L}^{-1}$ ).  $C_{F^-}$  are 0, 0.1, 0.2, 0.3, 0.45, 0.55, 0.65, 0.75, 0.85, 1, 1.2, 1.4, 1.6, 1.8, 2, 2.5, 3, 3.5, 4, 4.5, 5,  $6 \times 10^{-5} \text{ mol/L}$ .

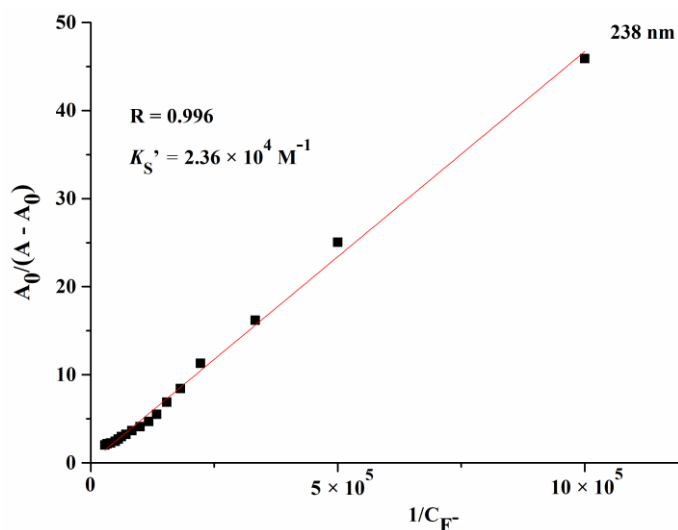

**Fig. S16** Linear relationship between  $A_0/(A - A_0)$  versus  $1/C_{F^-}$  at 238 nm based on the standard equation: Benesi-Hildebrand plots.

$$A_0/(A - A_0) = [\varepsilon_f/(\varepsilon_f - \varepsilon_c)](1/K'S_{F^-} + 1) \quad (2)$$

where  $A_0$  was the absorbance of **2** without  $F^-$  and  $A - A_0$  was the discrepancy of absorbances with or without  $F^-$ ;  $\varepsilon_f$  and  $\varepsilon_c$  were the molar extinction coefficients of  $F^-$  and  $2\cdot F^-$ , respectively;  $C_{F^-}$  was the concentration of  $F^-$ .

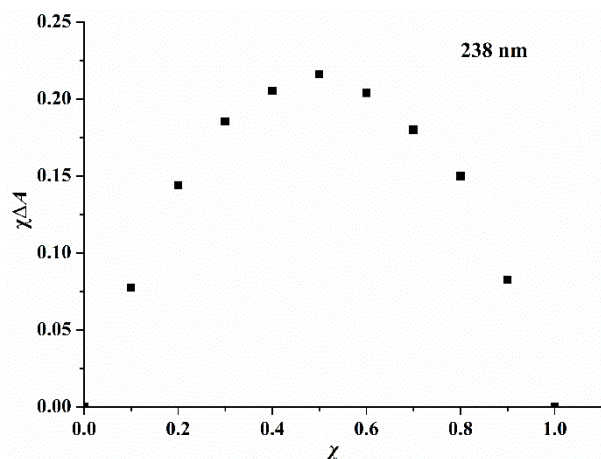

**Fig. S17** Job's plot for 2·F<sup>-</sup> in CH<sub>3</sub>CN at 238 nm.

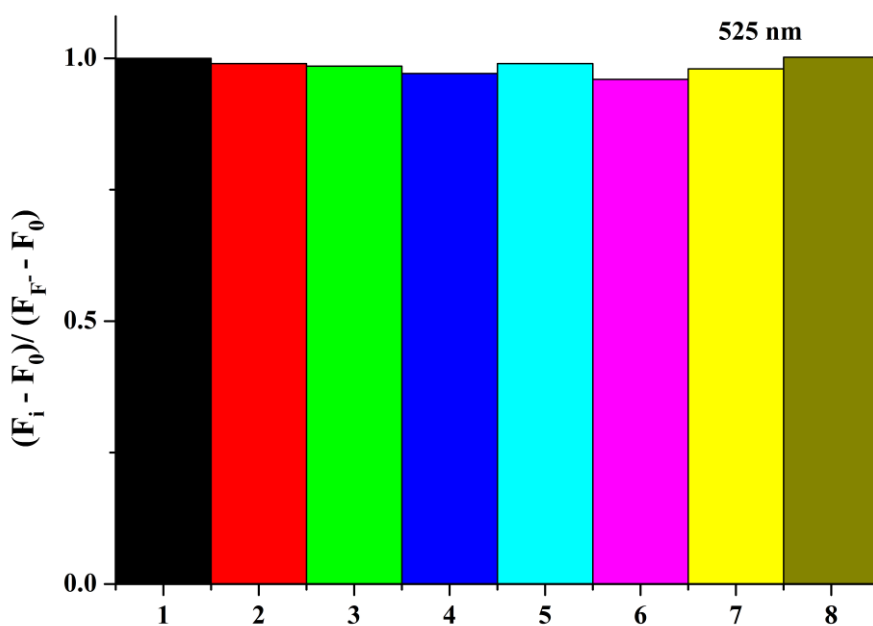

**Fig. S18** Change ratio  $(F_i - F_0)/(F_{F^-} - F_0)$  of fluorescence intensity at 525 nm of **2** upon addition of 2 equiv. of F<sup>-</sup> in the presence of 2 equiv. of background anions. (1) F<sup>-</sup>; (2) F<sup>-</sup> + Cl<sup>-</sup>; (3) F<sup>-</sup> + Br<sup>-</sup>; (4) F<sup>-</sup> + I<sup>-</sup>; (5) F<sup>-</sup> + H<sub>2</sub>PO<sub>4</sub><sup>-</sup>; (6) F<sup>-</sup> + HSO<sub>4</sub><sup>-</sup>; (7) F<sup>-</sup> + OAc<sup>-</sup>; (8) F<sup>-</sup> + NO<sub>3</sub><sup>-</sup> in CH<sub>3</sub>CN at 25 °C.

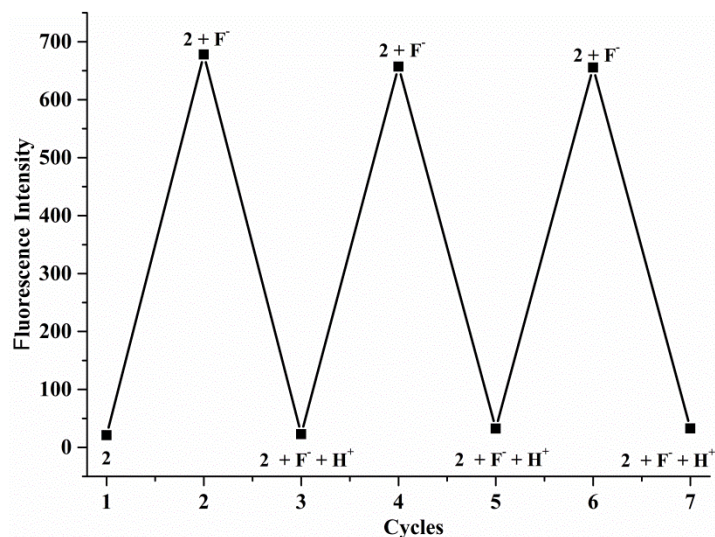

**Fig. S19** Reversible behavior of **2** upon the addition of TBAF and TFA.

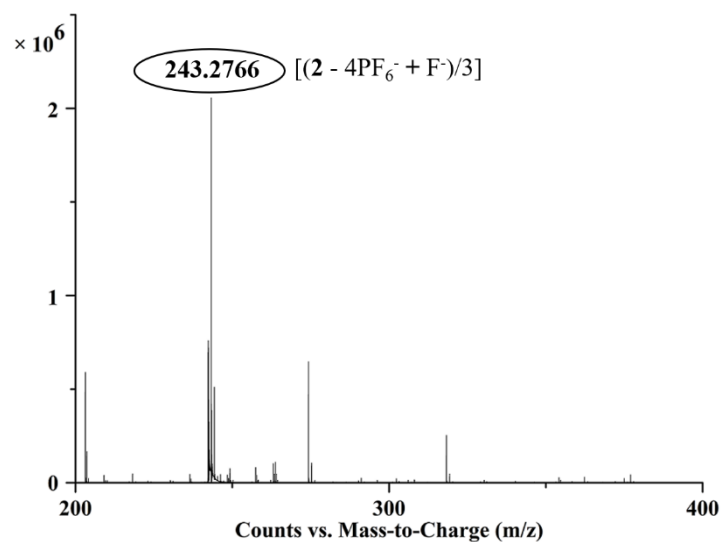

**Fig. S20** HRMS spectra for  $2 \cdot F^-$ . MS (EI):  $[(2 + F^- - 4PF_6^-)/3]^+ = 243.2766$ .

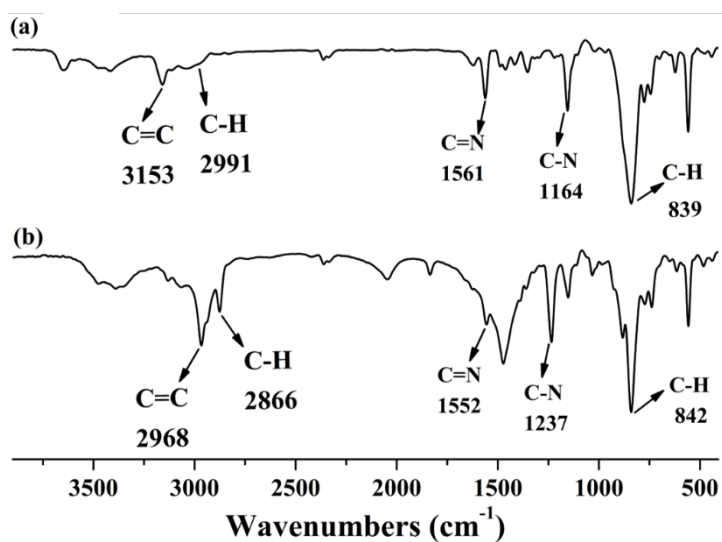

**Fig. S21** Infrared spectra of (a) **2** and (b)  $2 \cdot F^-$ .

**8. The  $^1H$  NMR and  $^{13}C$  NMR spectra of all intermediate, **1** and **2****

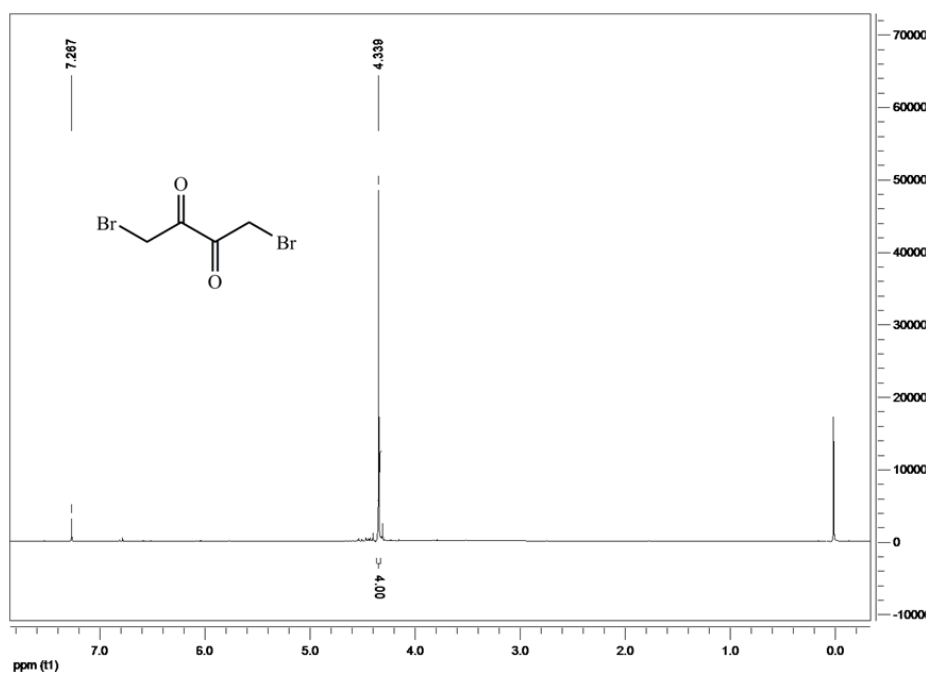

**Fig. S22** The  $^1\text{H}$  NMR (400 MHz,  $\text{CDCl}_3$ ) spectrum of 1,4-dibromo-2,3-butanedione.

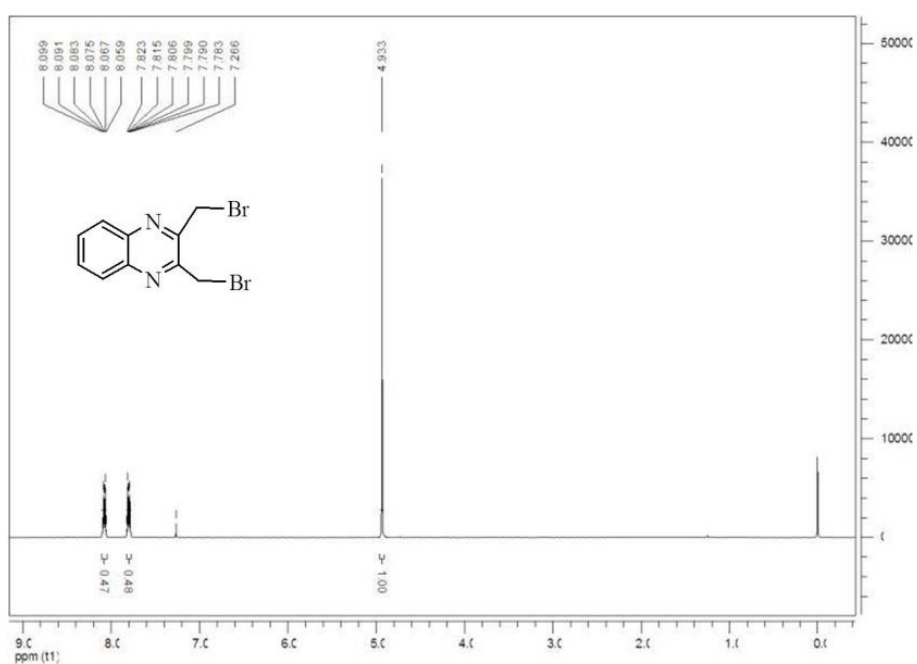

**Fig. S23** The  $^1\text{H}$  NMR (400 MHz,  $\text{CDCl}_3$ ) spectrum of 2,3-bis(bromomethyl)quinoxaline.

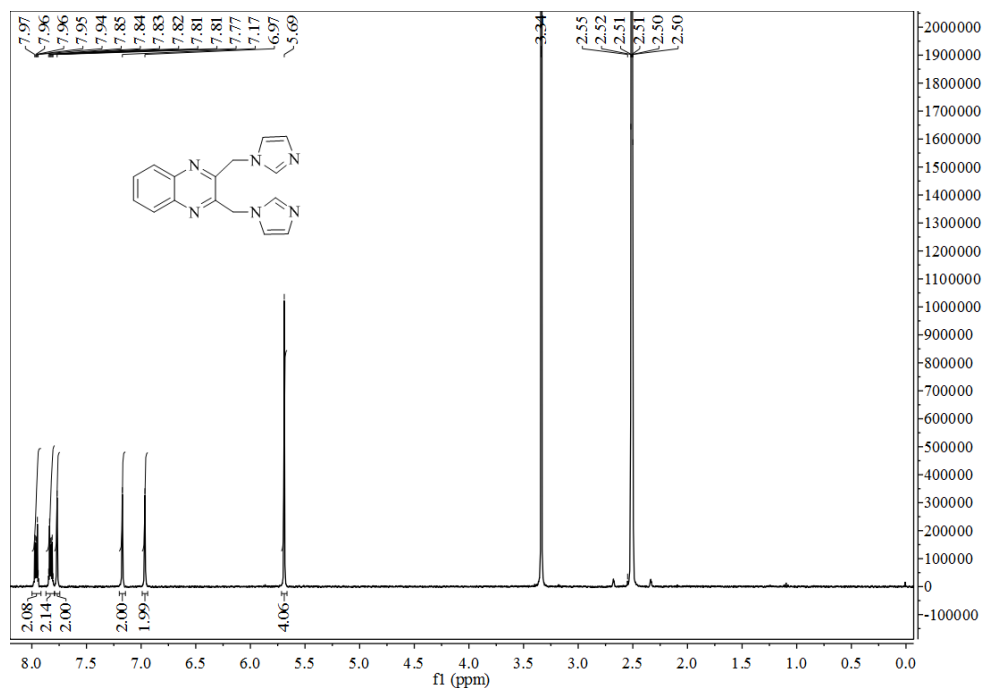

**Fig. S24** The  $^1\text{H}$  NMR (400 MHz,  $\text{DMSO-}d_6$ ) spectrum of 2,3-bis[1'-(imidazol-1'-yl)methyl]quinoxaline.

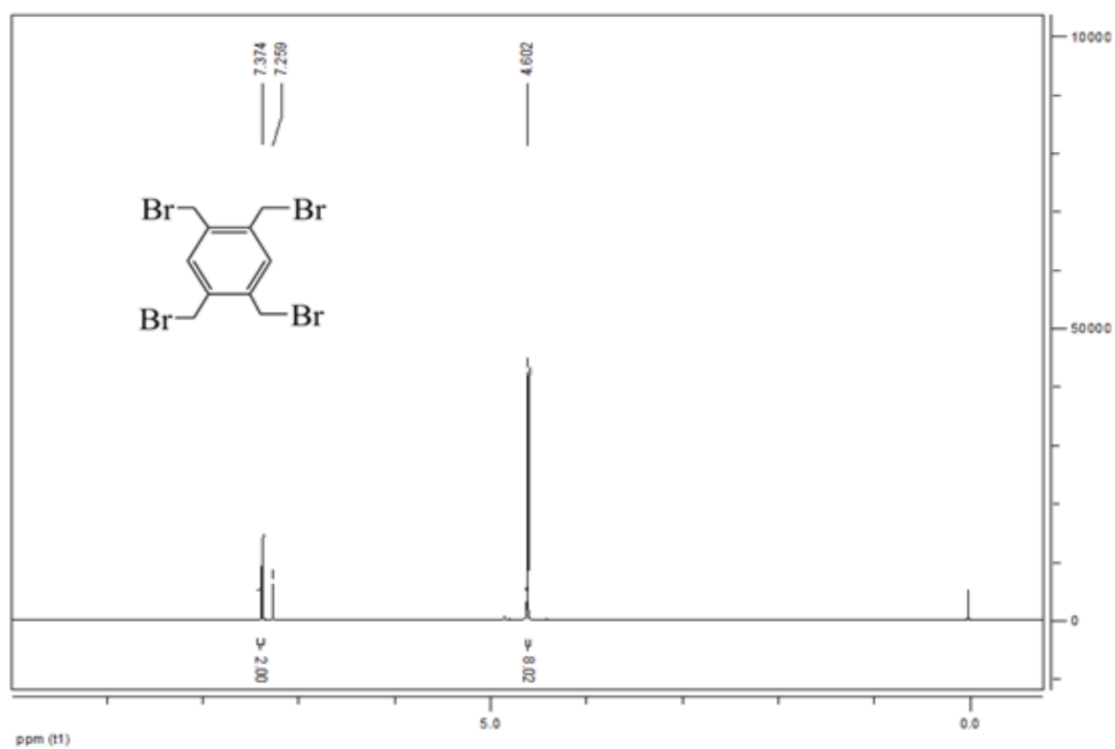

**Fig. S25** The  $^1\text{H}$  NMR (400 MHz,  $\text{DMSO-}d_6$ ) spectrum of 1,2,4,5-tetra(bromomethyl)benzene.

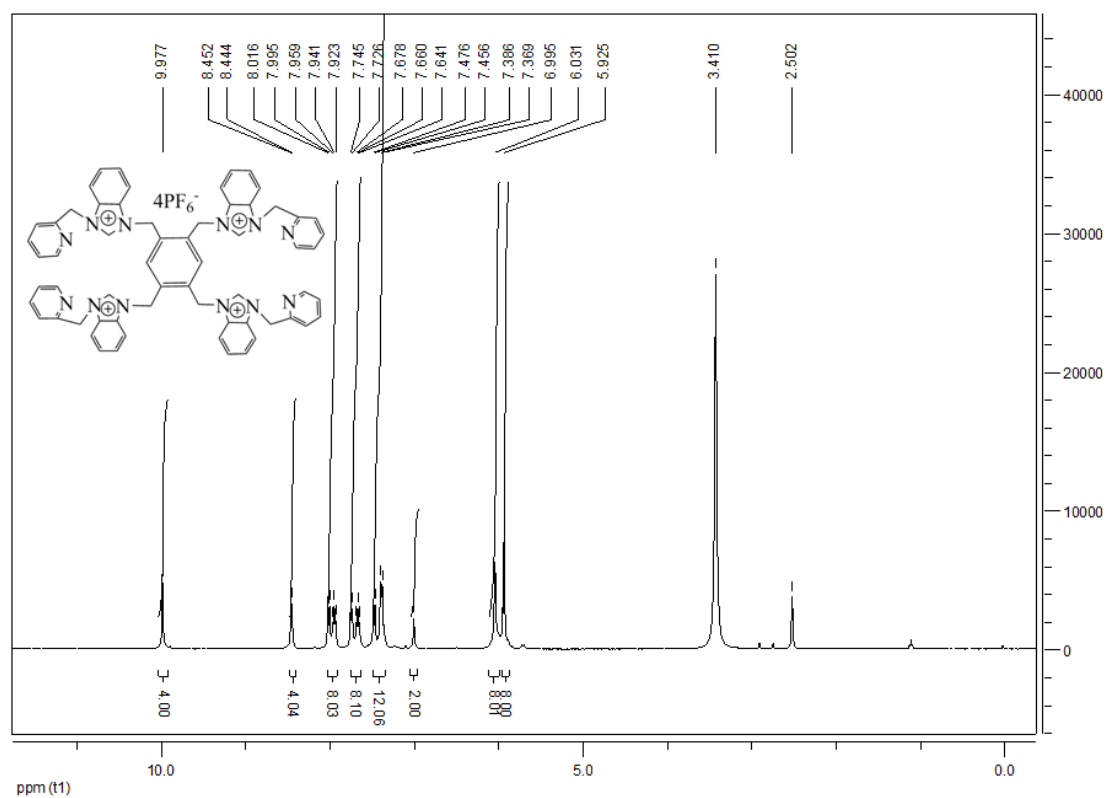

Fig. S26 The  $^1\text{H}$  NMR (400 MHz,  $\text{DMSO-}d_6$ ) spectrum of compound 1.

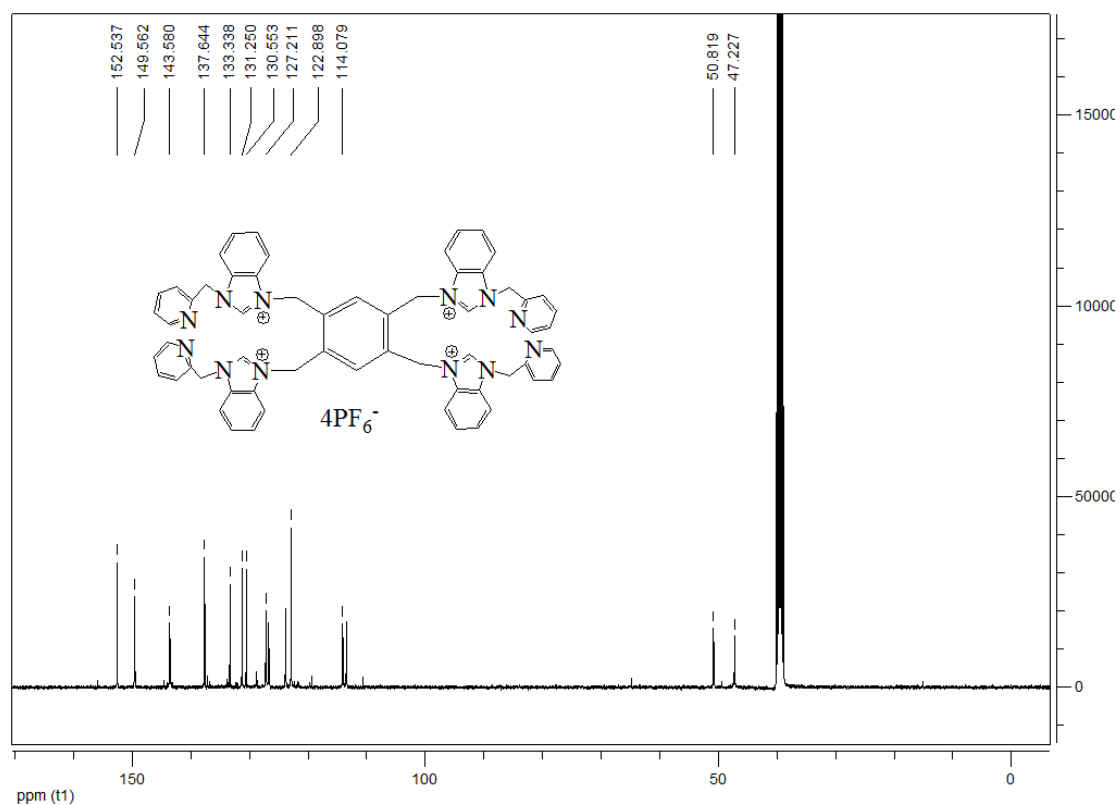

Fig. S27 The  $^{13}\text{C}$  NMR (100 MHz,  $\text{DMSO-}d_6$ ) spectrum of compound 1.

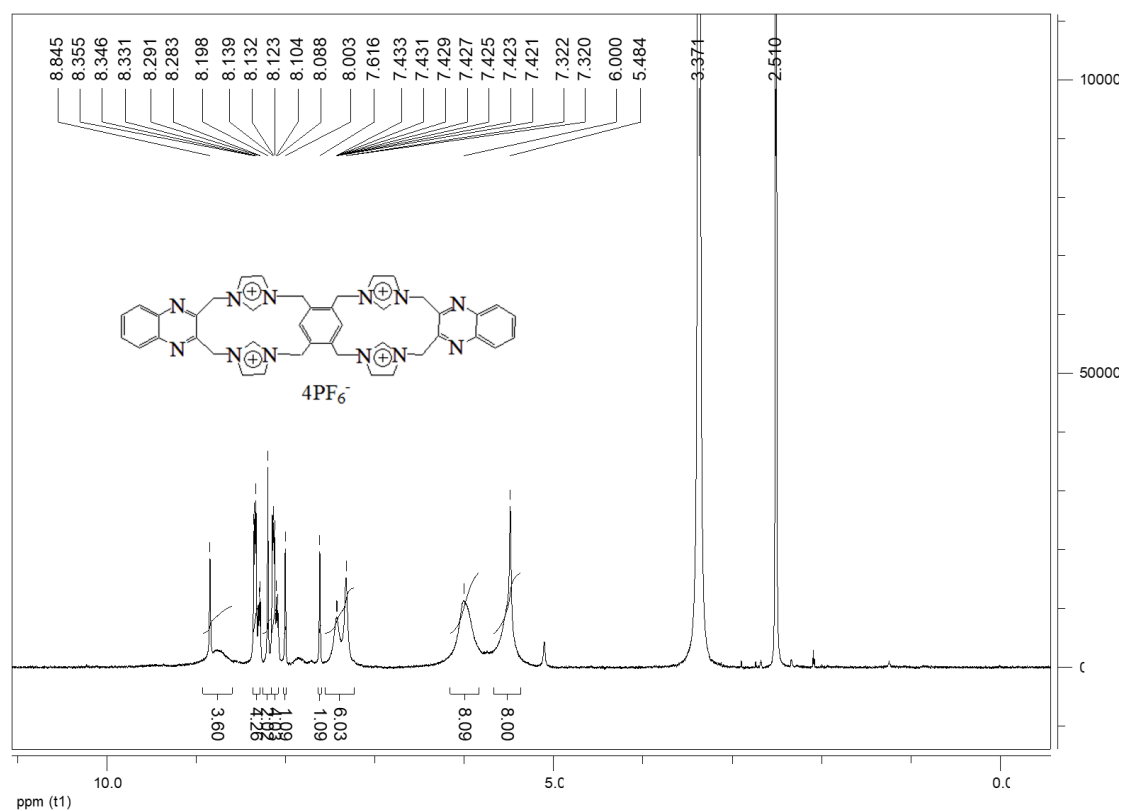

**Fig. S28** The  $^1H$  NMR (400 MHz,  $DMSO-d_6$ ) spectrum of compound **2**.

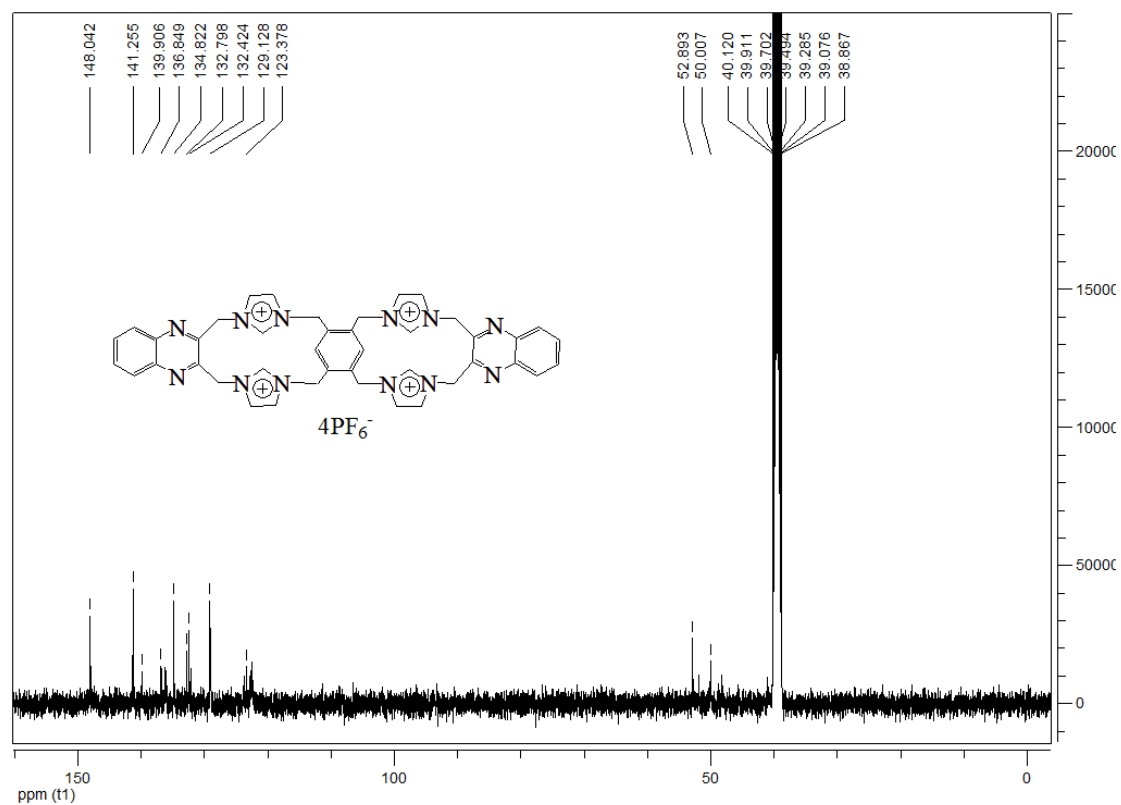

**Fig. S29** The  $^{13}C$  NMR (100 MHz,  $DMSO-d_6$ ) spectrum of compound **2**.
